# Supplementary material for: Reaction Norms in Natural Conditions: How Does Metabolic Performance Respond to Weather Variations in a Small Endotherm Facing Cold Environments?
Source: PLoS One. 2014 Nov 26;9(11):e113617. doi: 10.1371/journal.pone.0113617 (PMC4245212; doi:10.1371/journal.pone.0113617)
Supplement: Table S4 — Msum monthly variation. Least square means of Msum were calculated from an ANCOVA including body mass and month as fixed parameters. (XLS) [file pone.0113617.s004.xls]

## Sheet: Table S4 - Msum change
Msum - N = 222 (162 individuals)
Msum ~ month +mass
Month: F7,214 = 35.7, p< 0.0001; Mass:F1,214 =131.5, p < 0.0001
		Month	Mean (W)	sem
		Aug	1.23118	0.025561
		Sep	1.26439	0.0287215
		Oct	1.34134	0.0253637
		Nov	1.38423	0.0243222
		Dec	1.44034	0.026534
		Jan	1.4974	0.025561
		Feb	1.56365	0.0173926
		Mar	1.60071	0.0192784
Seasonal increase between August and February = 27.1%
